# Supplementary material for: Beneficial Effects of Dietary Fiber in Young Barley Leaf on Gut Microbiota and Immunity in Mice
Source: MDPI journal article supplement (doi:10.3390/molecules29081897), 2024-04-22
Supplement: s1 [file s1]

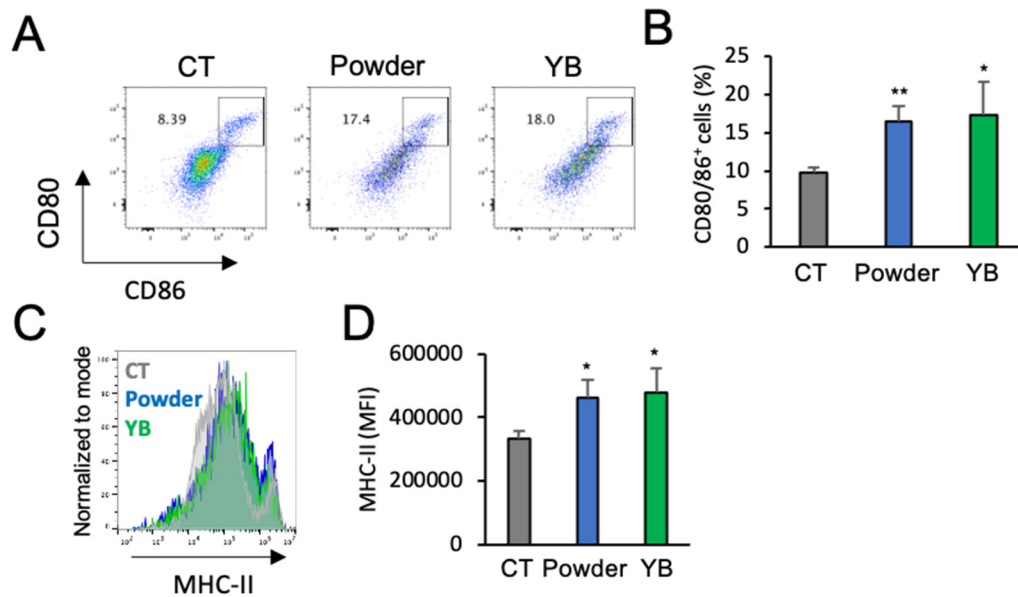

**Supplementary Figure S1.** Effect of young barley leaf powder (Powder, 5 mg/mL) or YB (3.7 mg/mL) on the BMDCs. (A, B) The percentage of CD80/86 positive cells in CD11c<sup>+</sup> BMDCs (n = 3). (C, D) The expression of MHC-II in CD11c<sup>+</sup> BMDCs (n = 4). the mean  $\pm$  SD. Dunnett's multiple comparison test was used for the statistical analysis. \* $p < 0.05$ ; \*\* $p < 0.01$  versus CT.

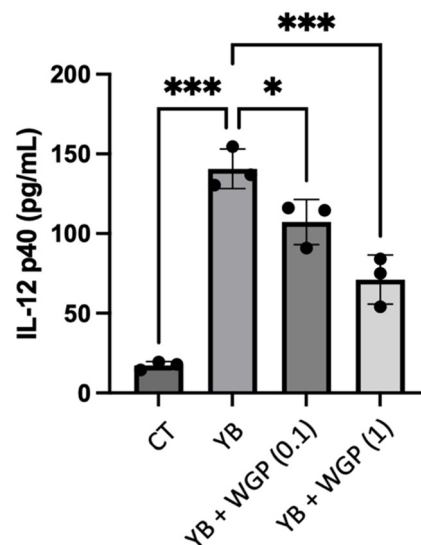

**Supplementary Figure S2.** Effect of Dectin-1 antagonist (WGP: 0.1 or 1 mg/mL) on IL-12 p40 production from BMDCs with YB treatment (n = 3). IL-12 p40 was measured by ELISA. Tukey's HSD post-hoc one-way ANOVA was performed for statistical analysis. \* $p < 0.05$ ; \*\*\* $p < 0.001$ .

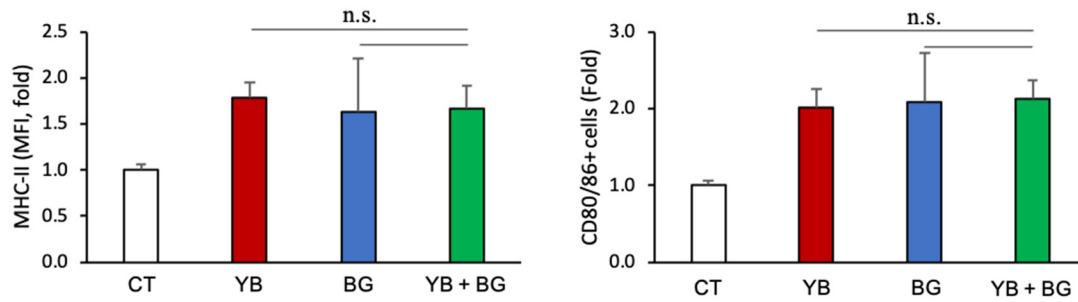

**Supplementary Figure S3.** Effect of YB and Dectin-1 agonist (b-glucan: BG, 10 mg/mL) on MHC-II and CD80/86 expression in BMDCs (n = 3). Tukey's HSD post-hoc one-way ANOVA was performed for statistical analysis. n.s.: not significant.

**Supplementary Table S1.**  $\alpha$ -diversity and statistical values.

|                   | CT          | YB           | H     | <i>p</i> -value | <i>q</i> -value |
|-------------------|-------------|--------------|-------|-----------------|-----------------|
| shannon           | 4.626±0.209 | 4.939±0.189  | 0.833 | 0.361           | 0.361           |
| obeseved_features | 131.4±16.65 | 158.12±12.16 | 1.200 | 0.273           | 0.273           |
| faith_pd          | 10.44±0.650 | 11.63±0.380  | 1.633 | 0.201           | 0.201           |
| evenness          | 0.662±0.011 | 0.677±0.020  | 0.300 | 0.584           | 0.584           |
| chao1             | 134.2±17.06 | 160.2±12.35  | 0.837 | 0.360           | 0.360           |

**Supplementary Table S2.** Statistical values at phylum level. \**q* < 0.05

| Phylum                          | <i>p</i> -value | <i>q</i> -value |
|---------------------------------|-----------------|-----------------|
| Firmicutes                      | 0.518           | 0.865           |
| Bacteroidota<br>(Bacteroidetes) | 0.972           | 0.972           |
| Desulfo bacterota               | 0.931           | 0.972           |
| Deferribacterota                | 0.0329          | 0.098           |
| Actinobacteriota                | 0.577           | 0.865           |
| Proteobacteria                  | 0.00728         | 0.043*          |
